# Supplementary material for: Associations between Sleep-Disordered Breathing and Serum Uric Acid and Their Sex Differences: The Nagahama Study
Source: MDPI journal article supplement (doi:10.3390/nu15194237), 2023-09-30
Supplement: s1 [file s1]

## Supplementary Figure legends

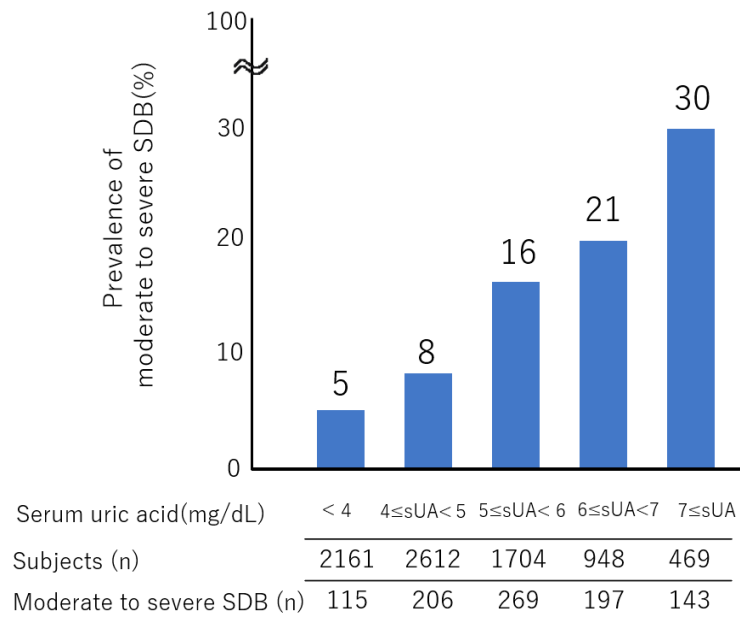

**Figure S1.** Changes in the prevalence of moderate to severe sleep-disordered breathing according to elevation in serum uric acid levels in all subjects. Moderate to severe sleep-disordered breathing was defined as  $15 \leq$  oxygen desaturation index 3%. sUA, serum uric acid; SDB, sleep-disordered breathing.

**Figure S2.** Changes in the prevalence of moderate to severe sleep-disordered breathing according to elevation in serum uric acid levels in females.

A. Analysis in postmenopausal/premenopausal females.

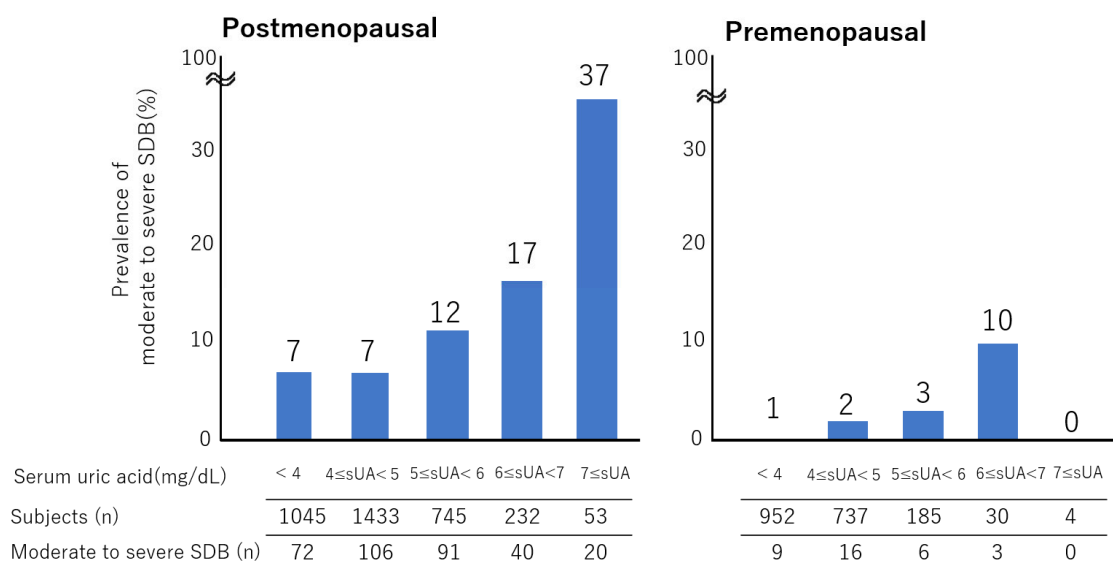

Moderate to severe sleep-disordered breathing was defined as  $15 \leq$  oxygen desaturation index 3%.

sUA, serum uric acid; SDB, sleep-disordered breathing.

B. Analysis in females aged  $\geq 60$  or below.

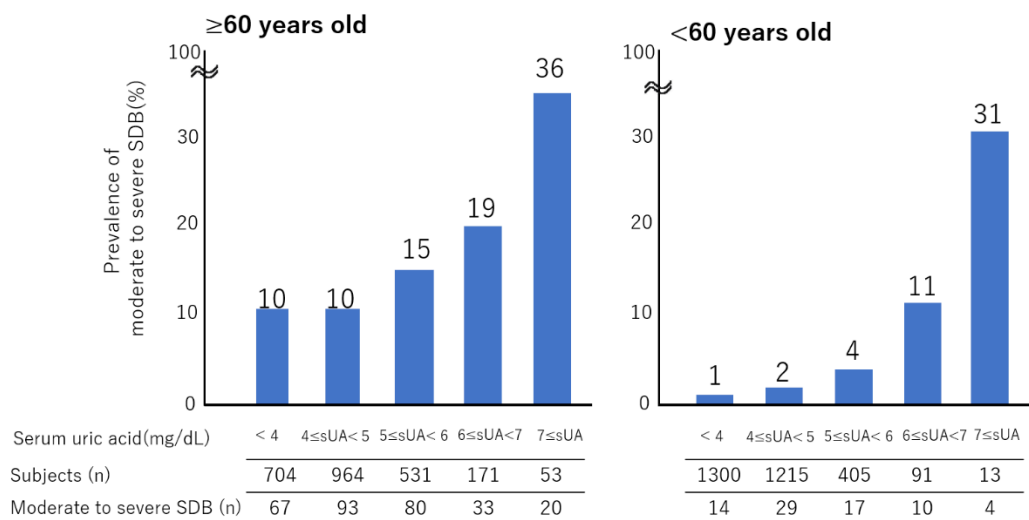

Moderate to severe sleep-disordered breathing was defined as  $15 \leq$  oxygen desaturation index 3%.

sUA, serum uric acid; SDB, sleep-disordered breathing.
